# Supplementary material for: Morphological and crystal structural control of tungsten trioxide for highly sensitive NO2 gas sensors
Source: Royal Society of Chemistry journal article supplement (doi:10.1039/c4tc02762k), 2014-12-12
Supplement: c4tc02762k1.pdf [file c4tc02762k1.pdf]

## Electronic Supplementary Information For

### **Morphological and crystal structural control of tungsten trioxide for highly sensitive NO<sub>2</sub> gas sensors**

Zhicong Meng,<sup>a</sup> Aya Fujii,<sup>a</sup> Takeshi Hashishin,<sup>b</sup> Noriyuki Wada,<sup>c</sup> Tomoe Sanada,<sup>a</sup> Jun Tamaki,<sup>a</sup> Kazuo Kojima,<sup>\*a</sup> Hitoshi Haneoka<sup>d</sup> and Takeyuki Suzuki<sup>d</sup>

a. *Department of Applied Chemistry, College of Life Sciences, Ritsumeikan University, 1-1-1, Nojihigashi, Kusatsu, Shiga 525-8577, Japan*

b. *Graduate School of Science and Technology, Kumamoto University, 2-39-1 Kurokami, Chuo-ku, Kumamoto 860-8555, Japan*

c. *Department of Materials Science and Engineering, Suzuka National College of Technology, Shiroko, Suzuka, Mie 510-0294, Japan*

d. *The Institute of Scientific and Industrial Research, Osaka University, Mihogaoka, Ibaraki, Osaka 567-0047, Japan*

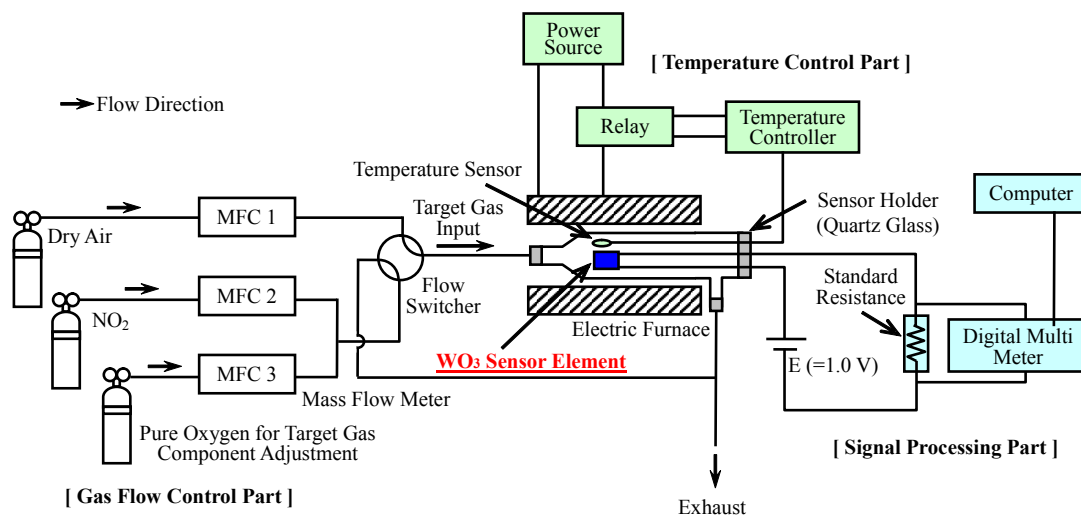

Fig. S1. Schematic diagram for sensing measurement equipment to dilute NO<sub>2</sub>.

### Sensing Measurement Method

When “Dry Air” was selected as “Target Gas” by using “Flow Switcher”, “Dry Air” was introduced into “Electric Furnace”. The flow rate of “Dry Air” was adjusted to 100 sccm (standard cubic centimeter per minute) by a mass flow controller 1 (MFC1). The operating temperature of “Electric Furnace” was set to be a predetermined temperature such as 200 °C, which was fixed by a Proportional-Integral-Derivative Controller (PID Controller): “Temperature Controller”. The voltage of “Standard Resistance (Rs)” connected directly to “WO<sub>3</sub> Sensor Element”, was monitored as an output voltage by “Digital Multi Meter” after the temperature reached the set-value of PID. When the initial output voltage was stabilized at the operating temperature under a stream of “Dry Air”, “Target Gas” was changed from “Dry Air” to “NO<sub>2</sub>”, by using “Flow Switcher”. After exposed to “NO<sub>2</sub>” for 3 min, “Target Gas” was changed from “NO<sub>2</sub>” to “Dry Air”. The output voltage was continuously monitored until reached the initial voltage in “Dry Air”.

Resistance in air (R<sub>a</sub>) and Resistance in NO<sub>2</sub> (R<sub>g</sub>) were calculated by the following equation.

$$R = [(E/V) - 1] R_s$$

where “R” is the resistance of “WO<sub>3</sub> Sensor Element” and “E” is the supplied voltage.

Actually, “NO<sub>2</sub>” is composed of 5.01-ppm NO<sub>2</sub> diluted with N<sub>2</sub>. When NO<sub>2</sub>

concentration was adjusted to be 0.5-ppm by MFC3, the flow rate of MFC3 was set to 20.0 sccm. In this case, the flow rate of “Dry Air” was set to 87.5 sccm, and that of “O<sub>2</sub>” to 2.5 sccm by MFC2. The addition of “O<sub>2</sub>” by MFC2 means adjusting the O<sub>2</sub> concentration to the same value of 21% as the atmospheric O<sub>2</sub> concentration.

NO<sub>2</sub> concentration of NO<sub>2</sub>-containing N<sub>2</sub>,  $\alpha$  (ppm), and NO<sub>2</sub> concentration predetermined,  $\beta$  (ppm), are calculated using the flow rate of “Dry Air”, X (sccm), that of “O<sub>2</sub>”, Y (sccm), and that of “NO<sub>2</sub>”, Z (sccm), as follows.

$$Z = (\beta/\alpha) \times 100$$

$$Y = (Z/0.79) \times 0.21 \approx 25 \times (\beta/\alpha)$$

$$X = 100 - Y - Z = 25 \times [4 - 5 \times (\beta/\alpha)]$$

Table S1. Ratio of W<sup>6+</sup> and W<sup>5+</sup>, that of surface O<sup>2-</sup>, OH<sup>-</sup>, and H<sub>2</sub>O, and binding energies of W4f<sub>5/2</sub>, W4f<sub>7/2</sub>, and O1s peaks for as-prepared C-m-WO<sub>3</sub> and H-h-WO<sub>3</sub>.

| Sample                   | W4f                   |                     | Sample              | O1s                   |                     |                      |
|--------------------------|-----------------------|---------------------|---------------------|-----------------------|---------------------|----------------------|
|                          | W <sup>6+</sup> [%]   | W <sup>5+</sup> [%] |                     | O <sup>2-</sup> [%]   | OH <sup>-</sup> [%] | H <sub>2</sub> O [%] |
| C-m-WO <sub>3</sub>      | 98.3                  | 1.7                 | C-m-WO <sub>3</sub> | 80.4                  | 4.9                 | 14.7                 |
| H-h-WO <sub>3</sub>      | 99.3                  | 0.7                 | H-h-WO <sub>3</sub> | 60.0                  | 38.1                | 1.9                  |
| C-m-WO <sub>3</sub>      | Binding energies (eV) |                     | C-m-WO <sub>3</sub> | Binding energies (eV) |                     |                      |
| W4f <sub>5/2</sub> peaks | 35.9                  | -                   | O1s peaks           | 530.7                 | 532.4               | 533.4                |
| W4f <sub>7/2</sub> peaks | 38.0                  | 36.9                |                     |                       |                     |                      |
| H-h-WO <sub>3</sub>      | Binding energies (eV) |                     | H-h-WO <sub>3</sub> | Binding energies (eV) |                     |                      |
| W4f <sub>5/2</sub> peaks | 36.1                  | -                   | O1s peaks           | 530.8                 | 531.6               | 532.1                |
| W4f <sub>7/2</sub> peaks | 38.2                  | 37.0                |                     |                       |                     |                      |
